# Supplementary material for: WITHDRAWN: From myometrium to fibrosis: the underlying mechanism of endometrial injury in intrauterine adhesions
Source: Research Square preprint supplement (doi:10.21203/rs.3.rs-5239094/v1), 2024-10-30
Supplement: Supplementary file 1 [file 27d9de41f1ed55301f5a152d.docx]

Table Ⅲ Comparison of baseline clinical data between M and I group

|  | M Group (n=8) | J Group (n=7) | *t/Z* | *P* |
| --- | --- | --- | --- | --- |
|  | ±*S* **/** *M*(*P*25, *P*75) | ±*S* / *M*(*P*25, *P*75) |
| Age (years) | 33.25±4.50 | 37(33.5, 37) | -1.283 | 0.199 |
| Gravidity | 3.38±2.07 | 3.43±1.27 | -0.059 | 0.954 |
| Abortion | 2.38±1.51 | 1.14±1.21 | 1.726 | 0.108 |
