# Supplementary material for: WITHDRAWN: From myometrium to fibrosis: the underlying mechanism of endometrial injury in intrauterine adhesions
Source: Research Square preprint supplement (doi:10.21203/rs.3.rs-5239094/v1), 2024-10-30
Supplement: Supplementary file 2 [file 36b4c1c26fcdaf6159a65a7c.docx]

Table Ⅳ Identified key genes or proteins in each comparison groups

|  | Genes or Proteins |
| --- | --- |
| B-J group | Kinesin-like protein KIF14, Chromosome-associated kinesin KIF4A , CIT,Complement C4-A, Complement C6, CFI,ORM1, ORM2,Alpha-1-antitrypsin, CP, HPX |
| B-I group | Kinesin-like protein KIF14, Tubulin beta-4B chain,Tubulin beta-4B chain, Complement C4-A , CFI, ORM1, ORM2, PAEP, PIGR, SLPI, CP, HPX |
| B-O group | Complement C4-A, CFI, CFP, ORM1, ORM2, CP, HPX, SERPINA1, ITIH2 |
| S-I group | Complement component C7, PROS1, Heparin cofactor 2, CLU, CD36, THBS4, ITIH2 |
| M-I group | HLA-DQA1, Unconventional myosin-Ig, ITGAL, ITGAX, PTPRC, CD48, CD38, BTK, CXCL12, Complement component C7, Complement component C3, HP, HPX, AMBP, PLEK, ITGA2B, ITGA4, and CD34, THBS4, Neuronal growth regulator 1, and VTN, TIMP1, TIMP3, ESR1, Basement membrane-specific heparan sulfate proteoglycan core protein |
