# Supplementary material for: WITHDRAWN: From myometrium to fibrosis: the underlying mechanism of endometrial injury in intrauterine adhesions
Source: Research Square preprint supplement (doi:10.21203/rs.3.rs-5239094/v1), 2024-10-30
Supplement: Supplementary file 3 [file 7fb289ed417c9e6c43bfdc59.docx]

Table Ⅱ Comparison of baseline clinical data between S and I group

|  | S Group (n=5) | J Group (n=7) | *t/Z* | *P* |
| --- | --- | --- | --- | --- |
|  | ±*S* **/** *M*(*P*25, *P*75) | ±*S* / *M*(*P*25, *P*75) |
| Age (years) | 33.80±1.92 | 37(33.5, 37) | -1.320 | 0.187 |
| Gravidity | 3.00±1.00 | 3.43±1.27 | -0.625 | 0.546 |
| Abortion | 2.00(1.00, 2.00) | 1.14±1.21 | -0.769 | 0.442 |
