# Supplementary material for: WITHDRAWN: From myometrium to fibrosis: the underlying mechanism of endometrial injury in intrauterine adhesions
Source: Research Square preprint supplement (doi:10.21203/rs.3.rs-5239094/v1), 2024-10-30
Supplement: Supplementary file 4 [file 967f923088762f4871d7ad51.docx]

TableⅠ Comparison of baseline clinical data between B and J group

|  | B Group (n=13) | J Group (n=7) | *t/Z* | *P* |
| --- | --- | --- | --- | --- |
|  | ±*S* **/** *M*(*P*25, *P*75) | ±*S* / *M*(*P*25, *P*75) |
| Age (years) | 33.46±3.62 | 37(33.5, 37) | -1.517 | 0.129 |
| Gravidity | 3.23±1.69 | 3.43±1.27 | -0.270 | 0.790 |
| Abortion | 2.00(1.00, 2.00) | 1.14±1.21 | -1.440 | 0.150 |
